# Supplementary material for: Systematic Analysis of the Multiple Bioactivities of Green Tea through a Network Pharmacology Approach
Source: Evid Based Complement Alternat Med. 2014 Nov 30;2014:512081. doi: 10.1155/2014/512081 (PMC4267163; doi:10.1155/2014/512081)
Supplement: Supplementary file 1 — Figure S1: Node degree distribution of the protein interaction network induced by GTPs. Figure S2-S4: GTPs mediated pathways in cardiovascular diseases, muscular disease and Inflammation, respectively. Table S1: 200 Homo targets and interactions of “GTPs-Targets-Disease”. Table S2: All pathways identified by pathway enrichment analysis and related targets/genes. [file 512081.f1.zip]

Archive with 3 entries (3 files):
- SI_Table S2.xlsx
- SI_Table s1.xlsx
- SI.docx
