# Supplementary material for: Systematic Analysis of the Multiple Bioactivities of Green Tea through a Network Pharmacology Approach
Source: Evid Based Complement Alternat Med. 2014 Nov 30;2014:512081. doi: 10.1155/2014/512081 (PMC4267163; doi:10.1155/2014/512081)
Supplement: Supplementary file 1 — Figure S1: Node degree distribution of the protein interaction network induced by GTPs. Figure S2-S4: GTPs mediated pathways in cardiovascular diseases, muscular disease and Inflammation, respectively. Table S1: 200 Homo targets and interactions of “GTPs-Targets-Disease”. Table S2: All pathways identified by pathway enrichment analysis and related targets/genes. [file 512081.f1.zip › SI_Table s1.xlsx]

## Sheet: Sheet1
GTPs	Interaction	Targets	Related Disease
13	pp	ABCC1	cancer
15	pp	ABCC1	cancer
15	pp	ABCC2	cancer
13	pp	ABCC4	cancer
13	pp	ABCG2	cancer
14	pp	ABCG2	cancer
15	pp	ABCG2	cancer
4	pp	ABO	Cardiovascular
8	pp	ABO	Cardiovascular
10	pp	ABO	Cardiovascular
14	pp	ADORA3	Cardiovascular
15	pp	ADORA3	Cardiovascular
13	pp	AHR	cancer
14	pp	AKR1A1	Unclassified
4	pp	AKR1B1	diabetic
5	pp	AKR1B1	diabetic
7	pp	AKR1B1	diabetic
12	pp	AKR1B1	diabetic
14	pp	AKR1B1	diabetic
15	pp	AKR1B1	diabetic
13	pp	AKR1B1	diabetic
3	pp	AKR1C3	cancer
1	pp	AKT1	Cancer
6	pp	AKT1	Cancer
9	pp	AKT1	Cancer
10	pp	AKT1	Cancer
10	pp	AKT2	cancer
3	pp	ALB	Cardiovascular
5	pp	ALB	Cardiovascular
6	pp	ALB	Cardiovascular
8	pp	ALB	Cardiovascular
2	pp	ALB	Cardiovascular
13	pp	ALOX12	cancer
14	pp	ALOX12	cancer
13	pp	ALOX15	Unclassified
14	pp	ALOX15	Unclassified
13	pp	ALOX5	Cardiovascular
14	pp	ALOX5	Cardiovascular
2	pp	ALPI	Unclassified
6	pp	ALPI	Unclassified
15	pp	ALPI	Unclassified
2	pp	ALPL	Unclassified
2	pp	ALPPL2	Unclassified
15	pp	ALPPL2	Unclassified
13	pp	AMY1C	diabetic
14	pp	AMY1C	diabetic
15	pp	AMY1C	diabetic
8	pp	ANG	cancer
6	pp	APEX1	cancer
9	pp	APEX1	cancer
15	pp	APOBEC3A	cancer
15	pp	APOBEC3G	cancer
5	pp	AR	Endocrine
13	pp	AR	Endocrine
5	pp	ARNT	Cancer
6	pp	ASCC3	cancer
11	pp	AURKA	Cancer
3	pp	BACE1	Neurdegenerative disease
5	pp	BACE1	Neurdegenerative disease
6	pp	BACE1	Neurdegenerative disease
7	pp	BACE1	Neurdegenerative disease
9	pp	BACE1	Neurdegenerative disease
10	pp	BACE1	Neurdegenerative disease
11	pp	BACE1	Neurdegenerative disease
12	pp	BACE1	Neurdegenerative disease
14	pp	BACE1	Neurdegenerative disease
15	pp	BACE1	Neurdegenerative disease
16	pp	BACE1	Neurdegenerative disease
6	pp	BAX	Cancer
6	pp	BAZ2B	Unclassified
13	pp	BCHE	Unclassified
12	pp	BTK	Cardiovascular
4	pp	CA2	cancer
1	pp	CALM1	Cardiovascular
14	pp	CALM3	inflammtion
14	pp	CAMK2B	Unclassified
13	pp	CCNB1	cancer
14	pp	CCNB1	cancer
13	pp	CCNB2	cancer
13	pp	CCNB3	Unclassified
13	pp	CCNB3	Unclassified
12	pp	CD38	cancer
13	pp	CD38	cancer
14	pp	CD38	cancer
15	pp	CD38	cancer
4	pp	CDC42	cancer
5	pp	CDC42	cancer
6	pp	CDK1	cancer
13	pp	CDK1	cancer
14	pp	CDK1	cancer
3	pp	CDK2	cancer
4	pp	CDK2	cancer
6	pp	CDK2	cancer
14	pp	CDK2	cancer
6	pp	CDK4	cancer
14	pp	CDK5	cancer
14	pp	CDK5R1	cancer
6	pp	CDK6	cancer
13	pp	CDK6	cancer
14	pp	CDK6	cancer
15	pp	CDK6	cancer
13	pp	CDKN1	Cancer
1	pp	CES2	Cancer
13	pp	CHRM1	Neurdegenerative disease
13	pp	CLK1	cancer
1	pp	CRABP2	cancer
3	pp	CRABP2	cancer
5	pp	CRABP2	cancer
11	pp	CRABP2	cancer
6	pp	CREB1	Cancer
13	pp	CTDSP1	Unclassified
6	pp	CYCLIN D1	cancer
13	pp	CYP19A1	Cancer
14	pp	CYP19A1	Cancer
15	pp	CYP19A1	Cancer
13	pp	CYP1A1	cancer
14	pp	CYP1A1	cancer
15	pp	CYP1A1	cancer
13	pp	CYP1A2	Neurdegenerative disease
14	pp	CYP1A2	Neurdegenerative disease
15	pp	CYP1A2	Neurdegenerative disease
13	pp	CYP1B1	cancer
14	pp	CYP1B1	cancer
13	pp	CYP2C9	diabetic
13	pp	CYP3A4	cancer
14	pp	CYP3A4	cancer
15	pp	CYP3A4	cancer
2	pp	DCK	cancer
4	pp	DCK	cancer
5	pp	DCK	cancer
6	pp	DCK	cancer
8	pp	DCK	cancer
11	pp	DCK	cancer
12	pp	DCK	cancer
6	pp	DLD	Neurdegenerative disease
1	pp	DRD1	Cardiovascular
6	pp	DYRK1A	Neurdegenerative disease
13	pp	DYRK1A	Neurdegenerative disease
2	pp	EGFR	Cancer
6	pp	EGFR	Cancer
14	pp	EGFR	Cancer
2	pp	EHMT2	Cancer
6	pp	ELANE	inflammtion
4	pp	ESR1	cancer
6	pp	ESR1	cancer
13	pp	ESR1	cancer
15	pp	ESR1	cancer
2	pp	ESRRG	cancer
3	pp	ESRRG	cancer
5	pp	FAS	Cancer
2	pp	FGFR1	cancer
6	pp	FKBP1A	Neurdegenerative disease
7	pp	FKBP1A	Neurdegenerative disease
11	pp	FKBP1A	Neurdegenerative disease
16	pp	FOLH1	cancer
6	pp	FXR1	Muscular
2	pp	GAA	diabetic
6	pp	GALK1	Cardiovascular
1	pp	GART	Unclassified
2	pp	GART	Unclassified
3	pp	GART	Unclassified
4	pp	GART	Unclassified
9	pp	GART	Unclassified
10	pp	GART	Unclassified
11	pp	GART	Unclassified
12	pp	GART	Unclassified
2	pp	GFER	Muscular
16	pp	GFPT1	Muscular
12	pp	GLO1	cancer
13	pp	GLO1	cancer
14	pp	GLO1	cancer
15	pp	GLO1	cancer
6	pp	GNAO1	cancer
3	pp	GPI	cancer
14	pp	GPR35	Unclassified
15	pp	GPR35	Unclassified
14	pp	GRIA1	Cancer
13	pp	GSK3A	Neurdegenerative disease
14	pp	GSK3A	Neurdegenerative disease
15	pp	GSK3A	Neurdegenerative disease
13	pp	GSK3B	Neurdegenerative disease
14	pp	GSK3B	Neurdegenerative disease
15	pp	GSK3B	Neurdegenerative disease
7	pp	GSTA1	cancer
11	pp	GSTA1	cancer
3	pp	GSTA3	Unclassified
2	pp	GSTO1	Neurdegenerative disease
16	pp	GSTO1	Neurdegenerative disease
4	pp	GSTP1	cancer
11	pp	GSTP1	cancer
16	pp	GSTP1	cancer
13	pp	HCK	cancer
14	pp	HCK	cancer
15	pp	HCK	cancer
6	pp	HGF	cancer
13	pp	HIF1A	cancer
5	pp	HIF1A	cancer
14	pp	HIF1AN	cancer
3	pp	HK1	diabetic
11	pp	HPGD	cancer
12	pp	HPGD	cancer
13	pp	HPGD	cancer
8	pp	HPRT1	cancer
1	pp	HRAS	Cancer
2	pp	HRAS	Cancer
3	pp	HRAS	Cancer
4	pp	HRAS	Cancer
5	pp	HRAS	Cancer
6	pp	HRAS	Cancer
7	pp	HRAS	Cancer
8	pp	HRAS	Cancer
11	pp	HRAS	Cancer
12	pp	HRAS	Cancer
14	pp	HRAS	Cancer
15	pp	HRAS	Cancer
1	pp	HSD17B1	Cancer
2	pp	HSD17B1	Cancer
3	pp	HSD17B1	Cancer
4	pp	HSD17B1	Cancer
5	pp	HSD17B1	Cancer
6	pp	HSD17B1	Cancer
7	pp	HSD17B1	Cancer
8	pp	HSD17B1	Cancer
9	pp	HSD17B1	Cancer
10	pp	HSD17B1	Cancer
11	pp	HSD17B1	Cancer
12	pp	HSD17B1	Cancer
13	pp	HSD17B1	Cancer
13	pp	HSD17B10	Neurdegenerative disease
13	pp	HSD17B2	Unclassified
14	pp	HSD17B2	Unclassified
6	pp	HSP90	cancer
6	pp	HSP90AA1	cancer
9	pp	HSP90AA1	cancer
11	pp	HSP90AA1	cancer
12	pp	HSP90AA1	cancer
6	pp	IGF1R	cancer
4	pp	INSR	cancer
6	pp	INSR	cancer
8	pp	INSR	cancer
14	pp	KARS	Neurdegenerative disease
15	pp	KARS	Neurdegenerative disease
6	pp	KCNH2	cancer
2	pp	KDM4DL	Unclassified
6	pp	KDM4DL	Unclassified
9	pp	KDM4DL	Unclassified
15	pp	KDM4DL	Unclassified
6	pp	KDR	Cancer
14	pp	LAP3	Unclassified
2	pp	LCK	cancer
13	pp	LCK	cancer
14	pp	LCK	cancer
15	pp	LCK	cancer
14	pp	MAOA	Neurdegenerative disease
14	pp	MAOB	Neurdegenerative disease
7	pp	MAP2K1	Cancer
5	pp	MAPK14	Cancer
6	pp	MAPK14	Cancer
12	pp	MAPK14	Cancer
13	pp	MAPK14	Cancer
14	pp	MAPK14	Cancer
15	pp	MAPK14	Cancer
6	pp	MAPK3	Cancer
6	pp	MAPT	alzheimer
13	pp	MAPT	alzheimer
6	pp	MCL1	Cancer
12	pp	MCL1	Cancer
13	pp	MCL1	Cancer
14	pp	MCL1	Cancer
15	pp	MCL1	Cancer
5	pp	MET	Cancer
6	pp	MET	Cancer
12	pp	MET	Cancer
6	pp	MEX-5	Unclassified
2	pp	MME	cancer
3	pp	MME	cancer
9	pp	MME	cancer
10	pp	MME	cancer
16	pp	MME	cancer
14	pp	MMP12	inflammtion
14	pp	MMP13	Cancer
12	pp	MMP14	Cancer
6	pp	MMP14	Cancer
7	pp	MMP14	Cancer
8	pp	MMP14	Cancer
6	pp	MMP2	Cancer
14	pp	MMP2	Cancer
8	pp	MMP2	Cancer
14	pp	MMP3	Cancer
6	pp	MMP7	Cancer
8	pp	MMP7	Cancer
14	pp	MMP9	Cancer
6	pp	MPI	Unclassified
14	pp	MPO	Cardiovascular
15	pp	MYLK	Cardiovascular
13	pp	NEU1	cancer
14	pp	NEU1	cancer
13	pp	NFE2L2	Unclassified
6	pp	NFKB1	inflammtion
3	pp	NFKB2	inflammtion
8	pp	NFKB2	inflammtion
10	pp	NFKB2	inflammtion
6	pp	NOTCH4	cancer
13	pp	NOX4	Cardiovascular
14	pp	NOX4	Cardiovascular
15	pp	NOX4	Cardiovascular
1	pp	NR1H4	cancer
2	pp	NR1H4	cancer
2	pp	NR3C1	diabetic
3	pp	OPRD1	Neurdegenerative disease
5	pp	OPRD1	Neurdegenerative disease
11	pp	OPRD1	Neurdegenerative disease
3	pp	OPRK1	Neurdegenerative disease
5	pp	OPRK1	Neurdegenerative disease
11	pp	OPRK1	Neurdegenerative disease
3	pp	OPRM1	Neurdegenerative disease
5	pp	OPRM1	Neurdegenerative disease
11	pp	OPRM1	Neurdegenerative disease
6	pp	PABPC1	cancer
13	pp	PAFAH1B3	Cardiovascular
4	pp	PAH	diabetic
11	pp	PCTP	Unclassified
1	pp	PDE4D	Cardiovascular
2	pp	PDE4D	Cardiovascular
4	pp	PDE4D	Cardiovascular
5	pp	PDE4D	Cardiovascular
7	pp	PDE4D	Cardiovascular
8	pp	PDE4D	Cardiovascular
9	pp	PDE4D	Cardiovascular
10	pp	PDE4D	Cardiovascular
11	pp	PDE4D	Cardiovascular
12	pp	PDE4D	Cardiovascular
13	pp	PDE4D	Cardiovascular
14	pp	PDE4D	Cardiovascular
6	pp	PDK1	cancer
3	pp	PDPK1	Unclassified
10	pp	PDPK1	Unclassified
11	pp	PECR	Unclassified
6	pp	PGD	Neurdegenerative disease
11	pp	PGD	Neurdegenerative disease
12	pp	PGD	Neurdegenerative disease
14	pp	PIK3R1	cancer
13	pp	PIM1	cancer
14	pp	PIM1	cancer
15	pp	PIM1	cancer
13	pp	PIM2	cancer
13	pp	PIP4K2A	cancer
14	pp	PLA2G1B	cancer
13	pp	PLCG1	cancer
13	pp	PLCG2	cancer
14	pp	PLG	cancer
15	pp	PLG	cancer
6	pp	POLB	cancer
9	pp	POLB	cancer
2	pp	POLB	cancer
9	pp	POLH	cancer
13	pp	POLH	cancer
2	pp	POLI	cancer
13	pp	POLI	cancer
13	pp	PPARG	cancer
14	pp	PREP	cancer
13	pp	PRKAA2	cancer
9	pp	PRKACA	cancer
10	pp	PRKACA	cancer
6	pp	PRKCA	cancer
14	pp	PRSS1	inflammtion
15	pp	PRSS1	inflammtion
6	pp	PTEN	Cancer
1	pp	PTGS1	Cancer
2	pp	PTGS1	Cancer
10	pp	PTGS1	Cancer
13	pp	PTGS1	Cancer
14	pp	PTGS1	Cancer
15	pp	PTGS1	Cancer
1	pp	PTGS2	Cancer
13	pp	PTGS2	Cancer
14	pp	PTGS2	Cancer
15	pp	PTGS2	Cancer
11	pp	PTPN1	diabetic
14	pp	PTPN1	diabetic
2	pp	RACGAP1	cancer
13	pp	RACGAP1	cancer
5	pp	RAP2A	cancer
6	pp	RAP2A	cancer
8	pp	RAP2A	cancer
6	pp	RB1	Cancer
13	pp	RDRP	Unclassified
7	pp	RXRB	cancer
1	pp	SHBG	diabetic
3	pp	SHBG	diabetic
4	pp	SHBG	diabetic
6	pp	SHBG	diabetic
7	pp	SHBG	diabetic
3	pp	SORD	cancer
14	pp	SORD	cancer
6	pp	SQLE	Cancer
2	pp	SRC	Cancer
3	pp	SRC	Cancer
4	pp	SRC	Cancer
5	pp	SRC	Cancer
8	pp	SRC	Cancer
12	pp	SRC	Cancer
14	pp	SRC	Cancer
15	pp	SRC	Cancer
13	pp	STK16	Cancer
15	pp	STK33	Cancer
8	pp	SULT1A1	Cancer
5	pp	SULT2B1	Cancer
13	pp	SYK	Cancer
8	pp	TAP1	inflammtion
6	pp	TERT	cancer
5	pp	TGM3	inflammtion
6	pp	TGM3	inflammtion
8	pp	TGM3	inflammtion
6	pp	TP53	Cancer
13	pp	TUBB1	Cardiovascular
14	pp	TUBB1	Cardiovascular
15	pp	TUBB1	Cardiovascular
14	pp	TYR	Cancer
15	pp	TYR	Cancer
13	pp	UBE2I	cancer
14	pp	UBE2I	cancer
15	pp	UBE2I	cancer
3	pp	UBE2N	cancer
1	pp	UCK2	cancer
2	pp	UCK2	cancer
3	pp	UCK2	cancer
4	pp	UCK2	cancer
5	pp	UCK2	cancer
6	pp	UCK2	cancer
7	pp	UCK2	cancer
8	pp	UCK2	cancer
8	pp	UCK2	cancer
9	pp	UCK2	cancer
10	pp	UCK2	cancer
11	pp	UCK2	cancer
12	pp	UCK2	cancer
13	pp	UCK2	cancer
14	pp	UCK2	cancer
15	pp	UCK2	cancer
6	pp	VCP	Muscular
1	pp	VDR	diabetic
2	pp	VDR	diabetic
3	pp	VDR	diabetic
4	pp	VDR	diabetic
6	pp	VDR	diabetic
7	pp	VDR	diabetic
9	pp	VDR	diabetic
10	pp	VDR	diabetic
11	pp	VDR	diabetic
12	pp	XDH	Cancer
13	pp	XDH	Cancer
14	pp	XDH	Cancer
15	pp	XDH	Cancer
15	pp	XDH	Cancer
6	pp	XIAP	Cancer
7	pp	ZAP70	cancer

## Sheet: Sheet2
AHR
SORD
ABCC1
ABCC2
ABCC4
ABCG2
ABO
ADORA3
AKR1A1
AKR1B1
AKR1C3
AKT1
AKT2
ALB
ALOX12
ALOX15
ALOX5
ALPL
ALPPL2
AMY1C
ANG
APEX1
APOBEC3A
APOBEC3G
AR
ARNT
ASCC3
AURKA
BACE1
BAX
BAZ2B
BCHE
BTK
CA2
CALM1
CALM3
CAMK2B
CCNB1
CCNB2
CCNB3
CD38
CDC42
CDK1
CDK2
CDK4
CDK5
CDK5R1
CDK6
CDKN1
CDKN5
CES2
CHRM1
CLK1
CRABP2
CREB1
CTDSP1
CYCB3
CYCLIN D1
CYP19A1
CYP1A1
CYP1A2
CYP1B1
CYP2C9
CYP3A4
DCK
DHFR-1
DLD
DRD1
DYRK1A
EGFR
EHMT2
EIF4H
ELANE
ESR1
ESRRG
FAS
FGFR1
FKBP1A
FM18AAP
FOLH1
FXR1
GAA
GALK1
GART
GFER
GFPT1
GLO1
GNAO1
GPI
GPR35
GRIA1
GSK3A
GSK3B
GSTA1
GSTA3
GSTO1
GSTP1
GSTT2B
HCK
HGF
HIF1A
HIF1AN
HK1
HPGD
HPRT1
HRAS
HSD17B1
HSD17B10
HSD17B2
HSP90
HSP90AA1
IGF1R
INSR
KARS
KCNH2
KDM4DL
KDR
KIAA1149
LAP3
LCK
MAOA
MAOB
MAP2K1
MAPK14
MAPK3
MAPT
MCL1
MET
MEX-5
MME
MMP12
MMP13
MMP14
MMP2
MMP3
MMP7
MMP9
MPI
MPO
MYLK
NANH
NFE2L2
NFKB1
NFKB2
NOTCH4
NOX4
NR1H4
NR3C1
OPRD1
OPRK1
OPRM1
ORF1AB
PABPC1
PAFAH1B3
PAH
PCTP
PDE4D
PDK1
PDPK1
PECR
PGD
PIK3R1
PIM1
PIM2
PIP4K2A
PLA2G1B
PLCG1
PLCG2
PLG
POLB
POLH
POLI
PPARG
PREP
PRKAA2
PRKACA
PRKCA
PRSS1
PTEN
PTGS1
PTGS2
PTPN1
RACGAP1
RAP2A
RB1
RDRP
RXRB
SHBG
SORD
SQLE
SRC
STK16
STK33
SULT1A1
SULT2B1
SYK
TAP1
TERT
TGM3
TP53
TUBB1
TYR
UBE2I
UBE2N
UCK2
VCP
VDR
XDH
XIAP
ZAP70
