# Supplementary material for: Systematic Analysis of the Multiple Bioactivities of Green Tea through a Network Pharmacology Approach
Source: Evid Based Complement Alternat Med. 2014 Nov 30;2014:512081. doi: 10.1155/2014/512081 (PMC4267163; doi:10.1155/2014/512081)
Supplement: Supplementary file 1 — Figure S1: Node degree distribution of the protein interaction network induced by GTPs. Figure S2-S4: GTPs mediated pathways in cardiovascular diseases, muscular disease and Inflammation, respectively. Table S1: 200 Homo targets and interactions of “GTPs-Targets-Disease”. Table S2: All pathways identified by pathway enrichment analysis and related targets/genes. [file 512081.f1.zip › SI_Table S2.xlsx]

## Sheet: Sheet1
GO_id	Term	Number Of Genes	p-value_bonferroni	Genes
hsa05200	Pathways in cancer	63	4.17e-27	RALGDS VEGFA MET AKT1 VEGFC HIF1A CASP9 NFKB1 AXIN1 CREBBP TP53 EGF CCNE1 FGF1 MMP9 PLCG1 GSTP1 GSK3B CDK4 PTGS2 AR RXRB MAPK3 GRB2 MMP2 XIAP CTNNB1 FAS PPARG BIRC2 EP300 CCND1 CDK6 CDKN1B CASP3 MAP2K1 VHL MTOR AKT2 PIK3R1 CCNA1 BAX NFKB2 HSP90AA1 EGLN1 FGFR1 mSKP2 RB1 CDC42 MDM2 CDK2 HRAS CBL IGF1R CCNE2 PLCG2 CDKN1A FGF2 EGFR HGF PRKCA PTENSTAT3
hsa05215	Prostate cancer	33	6.36e-23	MAPK3 AKT1 GRB2 AKT2 PIK3R1 PDPK1 CASP9 IGF1R CCNE2 CTNNB1 CDKN1A NFKB1 HSP90AA1 CREBBP TP53 EGF CCNE1 EP300 FGFR1 CCND1 GSTP1 EGFR RB1 CDKN1B CREB1 MAP2K1 GSK3B MDM2 CDK2 PTEN HRAS AR MTOR
hsa05214	Glioma	25	1.23e-17	CAMK2B MAPK3 AKT1 GRB2 CALM3 AKT2 PIK3R1 IGF1R CALM1 PLCG2 CDKN1A TP53 EGF CCND1 PLCG1 EGFR RB1 CDK6 MAP2K1 MDM2 CDK4 PRKCA PTEN HRAS MTOR
hsa04115	p53 signaling pathway	24	7.83e-16	CASP9 CHEK2 BAX MDM4 CCNE2 CDKN1A CCND2 FAS TP53 CCNE1 ATM CCND3 CHEK1 CCND1 CDK6 CASP3 MDM2 CDK2 CDK4 CCNB3 PTEN CCNB2 CCNB1 RCHY1
hsa04110	Cell cycle	30	6.58e-15	ANAPC11 CDC20 CCNA1 CREBBP CCND2 TP53 CCNE1 ATM CHEK1 PCNA SKP2 RB1 GSK3B MDM2 CDK2 CDK4 CCNA2 CHEK2 CUL1 CCNE2 CDKN1A EP300 CCND3 CCND1 CDK6 CDKN1B SKP1 CCNB3 CCNB2 CCNB1
hsa05218	Melanoma	22	5.14e-13	MAPK3 MET AKT1 AKT2 PIK3R1 IGF1R CDKN1A TP53 EGF FGF1 FGFR1 FGF2 CCND1 EGFR RB1 CDK6 HGF MAP2K1 MDM2 CDK4 PTEN HRAS
hsa05223	Non-small cell lung cancer	20	1.32e-12	MAPK3 AKT1 GRB2 AKT2 PDPK1 PIK3R1 CASP9 PLCG2 TP53 EGF CCND1 PLCG1 EGFR RB1 CDK6 MAP2K1 CDK4 PRKCA HRAS RXRB
hsa05213	Endometrial cancer	17	4.25e-10	MAPK3 AKT1 GRB2 AKT2 PDPK1 PIK3R1 CASP9 CTNNB1 AXIN1 TP53 EGF CCND1 EGFR GSK3B MAP2K1 PTEN HRAS
hsa05212	Pancreatic cancer	19	4.87e-10	RALGDS VEGFA MAPK3 AKT1 VEGFC AKT2 PIK3R1 CASP9 NFKB1 TP53 EGF CCND1 EGFR RB1 CDK6 CDC42 MAP2K1 CDK4 STAT3
hsa05219	Bladder cancer	15	1.37e-09	TP53 VEGFA EGF MAPK3 VEGFC CCND1 MMP9 EGFR MMP2 RB1 MAP2K1 MDM2 CDK4 CDKN1A HRAS
hsa04510	Focal adhesion	31	3.89e-09	VEGFA MET AKT1 VEGFC EGF GSK3B PAK1 MAPK3 GRB2 PDPK1 XIAP SRC CTNNB1 BIRC2 CCND3 CCND1 BCAR1 MAP2K1 MYLK AKT2 PIK3R1 CCND2 KDR CDC42 FLT1 HRAS IGF1R EGFR HGF PRKCA PTEN
hsa04012	ErbB signaling pathway	20	5.19e-09	CAMK2B MAPK3 AKT1 GRB2 AKT2 PIK3R1 SRC PLCG2 CDKN1A EGF PLCG1 EGFR CDKN1B MAP2K1 GSK3B PAK1 PRKCA HRAS MTOR CBL
hsa05211	Renal cell carcinoma	18	1.15e-08	VEGFA MAPK3 MET AKT1 GRB2 VEGFC HIF1A AKT2 PIK3R1 EGLN1 CREBBP EP300 CDC42 HGF MAP2K1 PAK1 VHL HRAS
hsa05222	Small cell lung cancer	20	1.57e-08	AKT1 AKT2 PIK3R1 CASP9 CCNE2 XIAP NFKB1 TP53 BIRC2 CCNE1 CCND1 SKP2 RB1 CDK6 CDKN1B CDK2 CDK4 PTEN PTGS2 RXRB
hsa05220	Chronic myeloid leukemia	17	1.7e-07	MAPK3 AKT1 GRB2 AKT2 PIK3R1 CDKN1A NFKB1 TP53 CCND1 RB1 CDK6 CDKN1B MAP2K1 MDM2 CDK4 HRAS CBL
hsa04660	T cell receptor signaling pathway	21	2.02e-07	LCK CD247 AKT1 ZAP70 AKT2 PIK3R1 NFKB1 PTPRC PLCG1 CDC42 GSK3B CD4 CDK4 PAK1 HRAS CBL MAPK3 GRB2 PDK1 MAPK14 MAP2K1
hsa04370	VEGF signaling pathway	17	4.14e-07	VEGFA PLA2G1B MAPK3 AKT1 AKT2 PIK3R1 CASP9 MAPK14 SRC PLCG2 PLCG1 KDR CDC42 MAP2K1 PRKCA PTGS2 HRAS
hsa05221	Acute myeloid leukemia	14	2.1e-06	MAPK3 AKT1 GRB2 PIM2 AKT2 PIK3R1 CCNA1 NFKB1 CCND1 MAP2K1 PIM1 STAT3 HRAS MTOR
hsa04722	Neurotrophin signaling pathway	20	6.41e-06	CAMK2B AKT1 AKT2 PIK3R1 BAX NFKB1 TP53 PLCG1 CDC42 GSK3B HRAS MAPK3 GRB2 PDK1 CALM3 CALM1 MAPK14 PLCG2 IRS1 MAP2K1
hsa05210	Colorectal cancer	14	8.6e-06	RALGDS MAPK3 AKT1 AKT2 PIK3R1 CASP9 BAX CTNNB1 AXIN1 TP53 CCND1 GSK3B CASP3 MAP2K1
hsa04914	Progesterone-mediated oocyte maturation	16	1.42e-05	MAPK3 AKT1 PRKACA ANAPC11 AKT2 PIK3R1 IGF1R CCNA1 MAPK14 HSP90AA1 MAP2K1 CDK2 CCNB3 CCNA2 CCNB2 CCNB1
hsa04114	Oocyte meiosis	18	1.74e-05	CAMK2B AURKA ANAPC11 CDC20 CCNE1 CDK2 AR MAPK3 PRKACA CALM3 IGF1R CALM1 CUL1 CCNE2 MAP2K1 SKP1 CCNB2 CCNB1
hsa04664	Fc epsilon RI signaling pathway	15	0.000105	PLA2G1B MAPK3 AKT1 GRB2 PDK1 SYK AKT2 PIK3R1 MAPK14 PLCG2 BTK PLCG1 MAP2K1 PRKCA HRAS
hsa04520	Adherens junction	14	0.000151	MAPK3 MET IQGAP1 IGF1R SRC INSR PTPN1 CTNNB1 CREBBP EP300 FGFR1 EGFR CDC42 WAS
hsa04912	GnRH signaling pathway	16	0.000169	CAMK2B PLA2G1B MMP14 CDC42 HRAS MAPK3 GRB2 PRKACA CALM3 MMP2 CALM1 MAPK14 SRC EGFR MAP2K1 PRKCA
hsa04910	Insulin signaling pathway	19	0.000203	AKT1 AKT2 PIK3R1 INSR HK1 GSK3B PRKAA2 HRAS CBL MAPK3 GRB2 PRKACA CALM3 PDPK1 CALM1 PTPN1 IRS1 MAP2K1 MTOR
hsa04916	Melanogenesis	15	0.000871	CAMK2B GNAO1 CREBBP GSK3B HRAS MAPK3 PRKACA CALM3 CALM1 CTNNB1 EP300 TYR CREB1 MAP2K1 PRKCA
hsa04210	Apoptosis	14	0.00202	AKT1 PRKACA AKT2 PIK3R1 CASP9 BAX XIAP NFKB1 FAS TP53 BIRC2 ATM CASP3 CASP7
hsa04666	Fc gamma R-mediated phagocytosis	14	0.00259	AKT1 AKT2 PIK3R1 PTPRC PLCG1 CDC42 WAS PAK1 HCK MAPK3 SYK PLCG2 MAP2K1 PRKCA
hsa03430	Mismatch repair	7	0.00289	RFC2 RFC5 RFC3 POLD1 RFC4 PCNA RFC1
hsa04150	mTOR signaling pathway	10	0.00306	VEGFA MAPK3 AKT1 VEGFC HIF1A AKT2 PDPK1 PIK3R1 PRKAA2 MTOR
hsa04662	B cell receptor signaling pathway	12	0.00379	MAPK3 AKT1 GRB2 SYK AKT2 PIK3R1 PLCG2 BTK NFKB1 GSK3B MAP2K1 HRAS
hsa05216	Thyroid cancer	8	0.0044	TP53 MAPK3 PPARG CCND1 MAP2K1 CTNNB1 HRAS RXRB
hsa03030	DNA replication	8	0.0087	RFC5 RFC3 RFC4 FEN1 PCNA RFC1 RFC2 POLD1
hsa04720	Long-term potentiation	11	0.0133	CAMK2B MAPK3 PRKACA CALM3 CALM1 GRIA1 CREBBP EP300 MAP2K1 PRKCA HRAS
hsa04120	Ubiquitin mediated proteolysis	15	0.0344	ANAPC11 CDC20 BRCA1 SKP2 MDM2 KEAP1 UBE2I CBL CUL1 XIAP BIRC2 SKP1 VHL UBE2N RCHY1
hsa04010	MAPK signaling pathway	24	0.0474	PLA2G1B AKT1 NFKB1 TP53 EGF FGF1 PAK1 MAPK3 GRB2 MAPK14 FAS CASP3 MAP2K1 RASA1 AKT2 NFKB2 FGFR1 MAPT CDC42 HRAS PRKACA FGF2 EGFR PRKCA
hsa00980	Metabolism of xenobiotics by cytochrome P450	10	0.0574	CYP3A4 GSTA3 CYP1A1 GSTP1 GSTO1 CYP1B1 CYP1A2 CYP2C9 GSTA1 AKR1C3
hsa05120	Epithelial cell signaling in Helicobacter pylori infection	10	0.0724	MET MAPK14 SRC PLCG2 NFKB1 PLCG1 EGFR CDC42 CASP3 PAK1
hsa04310	Wnt signaling pathway	15	0.133	CAMK2B AXIN1 CREBBP CCND2 TP53 GSK3B PRKACA CUL1 MMP7 CTNNB1 EP300 CCND3 CCND1 SKP1 PRKCA
hsa04062	Chemokine signaling pathway	17	0.145	AKT1 AKT2 PIK3R1 NFKB1 CDC42 GSK3B WAS PAK1 HRAS HCK MAPK3 GRB2 PRKACA BCAR1 GSK3A MAP2K1 STAT3
hsa00982	Drug metabolism - cytochrome P450	9	0.281	CYP3A4 MAOB GSTA3 GSTP1 GSTO1 MAOA CYP1A2 CYP2C9 GSTA1
hsa04650	Natural killer cell mediated cytotoxicity	15	0.364	LCK CD247 ZAP70 PIK3R1 PLCG1 PAK1 HRAS MAPK3 GRB2 SYK PLCG2 FAS CASP3 MAP2K1 PRKCA
hsa00590	Arachidonic acid metabolism	8	0.379	PLA2G1B ALOX12 ALOX5 PTGS1 ALOX15 CYP2C9 PTGS2 AKR1C3
hsa04810	Regulation of actin cytoskeleton	17	0.439	EGF FGF1 WAS PAK1 PIP4K2A MAPK3 BCAR1 MAP2K1 CHRM1 MYLK PIK3R1 FGFR1 CDC42 HRAS IQGAP1 FGF2 EGFR
hsa03420	Nucleotide excision repair	7	0.443	RFC5 RFC3 RFC2 POLD1 RFC4 PCNA RFC1
hsa04540	Gap junction	10	0.622	EGF HRAS MAPK3 GRB2 PRKACA SRC EGFR MAP2K1 PRKCA TUBB1
hsa04960	Aldosterone-regulated sodium reabsorption	6	0.715	MAPK3 IRS1 PIK3R1 PDPK1 INSR PRKCA
hsa00140	Steroid hormone biosynthesis	8	0.761	CYP3A4 SULT2B1 HSD17B1 HSD17B2 CYP19A1 CYP1A1 CYP1B1 AKR1C3
hsa05100	Bacterial invasion of epithelial cells	8	0.834	MET PIK3R1 SRC CTNNB1 BCAR1 CDC42 WAS CBL
hsa00591	Linoleic acid metabolism	5	0.981	PLA2G1B CYP3A4 ALOX15 CYP1A2 CYP2C9
hsa04320	Dorso-ventral axis formation	5	0.981	NOTCH4 MAPK3 GRB2 EGFR MAP2K1
hsa04730	Long-term depression	8	1	PLA2G1B MAPK3 IGF1R GNAO1 GRIA1 MAP2K1 PRKCA HRAS
hsa05010	Alzheimer's disease	14	1	CDK5 CASP9 MAPT HSD17B10 GSK3B MME MAPK3 CALM3 BACE1 CDK5R1 CALM1 FAS CASP3 CASP7
hsa03410	Base excision repair	5	1	APEX1 FEN1 PCNA POLD1 POLB
hsa04920	Adipocytokine signaling pathway	8	1	AKT1 AKT2 NFKB1 IRS1 PRKAA2 STAT3 RXRB MTOR
hsa04070	Phosphatidylinositol signaling system	8	1	CALM3 PIK3R1 CALM1 PLCG2 PLCG1 PIP4K2A PRKCA PTEN
hsa05340	Primary immunodeficiency	6	1	LCK ZAP70 TAP1 BTK PTPRC CD4
hsa04670	Leukocyte transendothelial migration	10	1	PIK3R1 MMP9 PLCG1 CDC42 MMP2 MAPK14 PLCG2 CTNNB1 BCAR1 PRKCA
hsa04930	Type II diabetes mellitus	6	1	MAPK3 PIK3R1 INSR IRS1 HK1 MTOR
hsa00380	Tryptophan metabolism	5	1	CYP1A1 MAOB CYP1B1 MAOA CYP1A2
hsa04630	Jak-STAT signaling pathway	12	1	AKT1 AKT2 PIK3R1 CREBBP CCND2 PIM1 CBL GRB2 EP300 CCND3 CCND1 STAT3
hsa00480	Glutathione metabolism	6	1	PGD GSTA3 LAP3 GSTP1 GSTO1 GSTA1
hsa00052	Galactose metabolism	4	1	HK1 AKR1B1 GAA GALK1
hsa04971	Gastric acid secretion	7	1	CAMK2B PRKACA MYLK CALM3 CALM1 CA2 PRKCA
hsa00232	Caffeine metabolism	2	1	CYP1A2 XDH
hsa05142	Chagas disease	9	1	CD247 AKT1 AKT2 PIK3R1 GNAO1 NFKB1 MAPK3 MAPK14 FAS
hsa00520	Amino sugar and nucleotide sugar metabolism	5	1	MPI GPI GFPT1 HK1 GALK1
hsa00360	Phenylalanine metabolism	3	1	PAH MAOA MAOB
hsa04530	Tight junction	10	1	AKT1 AKT2 CDC42 CDK4 HRAS PARD6A SRC CTNNB1 PRKCA PTEN
hsa00051	Fructose and mannose metabolism	4	1	MPI HK1 AKR1B1 SORD
hsa05014	Amyotrophic lateral sclerosis (ALS)	6	1	CASP9 MAPK14 BAX GRIA1 TP53 CASP3
hsa04144	Endocytosis	14	1	MET EGF PARD6A SRC KDR CDC42 MDM2 FLT1 HRAS CBL IGF1R EPS15 EGFR SH3KBP1
hsa04621	NOD-like receptor signaling pathway	6	1	MAPK3 MAPK14 XIAP NFKB1 HSP90AA1 BIRC2
hsa00983	Drug metabolism - other enzymes	5	1	CYP3A4 UCK2 HPRT1 CES2 XDH
hsa00790	Folate biosynthesis	2	1	ALPL ALPPL2
hsa02010	ABC transporters	5	1	TAP1 ABCG2 ABCC2 ABCC4 ABCC1
hsa04020	Calcium signaling pathway	11	1	CAMK2 BCD38 CHRM1 MYLK PLCG1 PRKACA CALM3 CALM1 PLCG2 EGFR PRKCA
hsa05131	Shigellosis	5	1	MAPK3 MAPK14 NFKB1 CDC42 WAS
hsa04270	Vascular smooth muscle contraction	8	1	PLA2G1B MYLK MAPK3 PRKACA CALM3 CALM1 MAP2K1 PRKCA
hsa05020	Prion diseases	4	1	MAPK3 PRKACA BAX MAP2K1
hsa00920	Sulfur metabolism	2	1	SULT2B1 SULT1A1
hsa05130	Pathogenic Escherichia coli infection	5	1	CTNNB1 CDC42 WAS PRKCA TUBB1
hsa00260	Glycine, serine and threonine metabolism	3	1	DLD MAOB MAOA
hsa04620	Toll-like receptor signaling pathway	7	1	AKT1 AKT2 PIK3R1 NFKB1 MAPK3 MAPK14 MAP2K1
hsa04970	Salivary secretion	6	1	CD38 PRKACA CALM3 AMY1C CALM1 PRKCA
hsa04360	Axon guidance	8	1	CDK5 MET RASA1 CDC42 GSK3B PAK1 HRAS MAPK3
hsa00500	Starch and sucrose metabolism	4	1	GPI AMY1C HK1 GAA
hsa04350	TGF-beta signaling pathway	6	1	MAPK3 SP1 CUL1 CREBBP EP300 SKP1
hsa04330	Notch signaling pathway	4	1	NOTCH4 KAT2B CREBBP EP300
hsa05217	Basal cell carcinoma	4	1	CTNNB1 AXIN1 TP53 GSK3B
hsa05110	Vibrio cholerae infection	4	1	PRKACA PLCG2 PLCG1 PRKCA
hsa00562	Inositol phosphate metabolism	4	1	PLCG2 PLCG1 PIP4K2A PTEN
hsa00620	Pyruvate metabolism	3	1	DLD GLO1 AKR1B1
hsa00350	Tyrosine metabolism	3	1	TYR MAOB MAOA
hsa04710	Circadian rhythm - mammal	2	1	CUL1 SKP1
hsa00830	Retinol metabolism	4	1	CYP3A4 CYP1A1 CYP1A2 CYP2C9
hsa00010	Glycolysis / Gluconeogenesis	4	1	GPI AKR1A1 DLD HK1
hsa05016	Huntington's disease	9	1	CASP9 BAX CREBBP TP53 SP1 PPARG EP300 CREB1 CASP3
hsa00030	Pentose phosphate pathway	2	1	GPI PGD
hsa04744	Phototransduction	2	1	CALM3 CALM1
hsa00340	Histidine metabolism	2	1	MAOB MAOA
hsa00330	Arginine and proline metabolism	3	1	MAOB LAP3 MAOA
hsa00565	Ether lipid metabolism	2	1	PLA2G1B PAFAH1B3
hsa05146	Amoebiasis	5	1	PIK3R1 NFKB1 PRKACA CASP3 PRKCA
hsa00280	Valine, leucine and isoleucine degradation	2	1	DLD HSD17B10
hsa04962	Vasopressin-regulated water reabsorption	2	1	PRKACA CREB1
hsa03320	PPAR signaling pathway	3	1	PDPK1 PPARG RXRB
hsa00561	Glycerolipid metabolism	2	1	AKR1A1 AKR1B1
hsa00230	Purine metabolism	6	1	POLD1 GART PDE4D XDH DCK HPRT1
hsa05144	Malaria	2	1	MET HGF
hsa04340	Hedgehog signaling pathway	2	1	PRKACA GSK3B
hsa04080	Neuroactive ligand-receptor interaction	9	1	ADORA3 OPRK1 CHRM1 OPRM1 OPRD1 GRIA1 PLG PRSS1 NR3C1
hsa04060	Cytokine-cytokine receptor interaction	9	1	VEGFA MET VEGFC EGF FAS KDR FLT1 EGFR HGF
hsa04640	Hematopoietic cell lineage	3	1	CD38 CD4 MME
hsa00240	Pyrimidine metabolism	3	1	POLD1 UCK2 DCK
hsa05140	Leishmaniasis	4	1	NFKB1 PTGS2 MAPK3 MAPK14
hsa04622	RIG-I-like receptor signaling pathway	2	1	MAPK14 NFKB1
hsa04146	Peroxisome	2	1	PECR XDH
hsa05416	Viral myocarditis	3	1	CASP9 CCND1 CASP3
hsa04612	Antigen processing and presentation	4	1	HSP90AA1 CD4 TAP1 CREB1
hsa05012	Parkinson's disease	2	1	CASP9 CASP3
hsa04142	Lysosome	2	1	NANH GAA
hsa04145	Phagosome	3	1	MPO TUBB1 TAP1
hsa04514	Cell adhesion molecules (CAMs)	2	1	PTPRC CD4
hsa04740	Olfactory transduction	4	1	CAMK2B PRKACA CALM3 CALM1
hsa04742	Taste transduction	1	1	PRKACA
hsa00400	Phenylalanine, tyrosine and tryptophan biosynthesis	1	1	PAH
hsa05414	Dilated cardiomyopathy	1	1	PRKACA
hsa00670	One carbon pool by folate	1	1	GART
hsa00910	Nitrogen metabolism	1	1	CA2
hsa05410	Hypertrophic cardiomyopathy (HCM)	1	1	PRKAA2
hsa05412	Arrhythmogenic right ventricular cardiomyopathy (ARVC)	1	1	CTNNB1
hsa00524	Butirosin and neomycin biosynthesis	1	1	HK1
hsa04940	Type I diabetes mellitus	1	1	FAS
hsa00310	Lysine degradation	1	1	EHMT2
hsa04623	Cytosolic DNA-sensing pathway	1	1	NFKB1
hsa00592	alpha-Linolenic acid metabolism	1	1	PLA2G1B
hsa00020	Citrate cycle (TCA cycle)	1	1	DLD
hsa04610	Complement and coagulation cascades	1	1	PLG
hsa00511	Other glycan degradation	1	1	NANH
hsa04614	Renin-angiotensin system	1	1	MME
hsa00740	Riboflavin metabolism	1	1	TYR
hsa00601	Glycosphingolipid biosynthesis - lacto and neolacto series	1	1	ABO
hsa00600	Sphingolipid metabolism	1	1	NANH
hsa03450	Non-homologous end-joining	1	1	FEN1
hsa00040	Pentose and glucuronate interconversions	1	1	AKR1B1
hsa03440	Homologous recombination	1	1	POLD1
hsa00100	Steroid biosynthesis	1	1	SQLE
hsa00760	Nicotinate and nicotinamide metabolism	1	1	CD38
hsa05322	Systemic lupus erythematosus	1	1	ELANE
hsa05320	Autoimmune thyroid disease	1	1	FAS
hsa03010	Ribosome	1	1	RPL11
hsa00250	Alanine, aspartate and glutamate metabolism	1	1	GFPT1
hsa00970	Aminoacyl-tRNA biosynthesis	1	1	KARS
hsa04140	Regulation of autophagy	1	1	PRKAA2
hsa00564	Glycerophospholipid metabolism	1	1	PLA2G1B
hsa04966	Collecting duct acid secretion	1	1	CA2
hsa05330	Allograft rejection	1	1	FAS
hsa04964	Proximal tubule bicarbonate reclamation	1	1	CA2
hsa05332	Graft-versus-host disease	1	1	FAS
hsa01040	Biosynthesis of unsaturated fatty acids	1	1	PECR

## Sheet: Sheet2
hsa05200	Pathways in cancer	63	1.97e-29	4.17e-27	4.17e-27
RALGDS
VEGFA
MET
AKT1
VEGFC
HIF1A
CASP9
NFKB1
AXIN1
CREBBP
TP53
EGF
CCNE1
FGF1
MMP9
PLCG1
GSTP1
GSK3B
CDK4
PTGS2
AR
RXRB
MAPK3
GRB2
MMP2
XIAP
CTNNB1
FAS
PPARG
BIRC2
EP300
CCND1
CDK6
CDKN1B
CASP3
MAP2K1
VHL
MTOR
AKT2
PIK3R1
CCNA1
BAX
NFKB2
HSP90AA1
EGLN1
FGFR1
SKP2
RB1
CDC42
MDM2
CDK2
HRAS
CBL
IGF1R
CCNE2
PLCG2
CDKN1A
FGF2
EGFR
HGF
PRKCA
PTEN
STAT3
hsa05215	Prostate cancer	33	3e-25	6.36e-23	3.18e-23
MAPK3
AKT1
GRB2
AKT2
PIK3R1
PDPK1
CASP9
IGF1R
CCNE2
CTNNB1
CDKN1A
NFKB1
HSP90AA1
CREBBP
TP53
EGF
CCNE1
EP300
FGFR1
CCND1
GSTP1
EGFR
RB1
CDKN1B
CREB1
MAP2K1
GSK3B
MDM2
CDK2
PTEN
HRAS
AR
MTOR
hsa05214	Glioma	25	5.81e-20	1.23e-17	4.11e-18
CAMK2B
MAPK3
AKT1
GRB2
CALM3
AKT2
PIK3R1
IGF1R
CALM1
PLCG2
CDKN1A
TP53
EGF
CCND1
PLCG1
EGFR
RB1
CDK6
MAP2K1
MDM2
CDK4
PRKCA
PTEN
HRAS
MTOR
hsa04115	p53 signaling pathway	24	3.69e-18	7.83e-16	1.96e-16
CASP9
CHEK2
BAX
MDM4
CCNE2
CDKN1A
CCND2
FAS
TP53
CCNE1
ATM
CCND3
CHEK1
CCND1
CDK6
CASP3
MDM2
CDK2
CDK4
CCNB3
PTEN
CCNB2
CCNB1
RCHY1
hsa04110	Cell cycle	30	3.1e-17	6.58e-15	1.32e-15
ANAPC11
CDC20
CCNA1
CREBBP
CCND2
TP53
CCNE1
ATM
CHEK1
PCNA
SKP2
RB1
GSK3B
MDM2
CDK2
CDK4
CCNA2
CHEK2
CUL1
CCNE2
CDKN1A
EP300
CCND3
CCND1
CDK6
CDKN1B
SKP1
CCNB3
CCNB2
CCNB1
hsa05218	Melanoma	22	2.42e-15	5.14e-13	8.57e-14
MAPK3
MET
AKT1
AKT2
PIK3R1
IGF1R
CDKN1A
TP53
EGF
FGF1
FGFR1
FGF2
CCND1
EGFR
RB1
CDK6
HGF
MAP2K1
MDM2
CDK4
PTEN
HRAS
hsa05223	Non-small cell lung cancer	20	6.25e-15	1.32e-12	1.89e-13
MAPK3
AKT1
GRB2
AKT2
PDPK1
PIK3R1
CASP9
PLCG2
TP53
EGF
CCND1
PLCG1
EGFR
RB1
CDK6
MAP2K1
CDK4
PRKCA
HRAS
RXRB
hsa05213	Endometrial cancer	17	2.01e-12	4.25e-10	5.31e-11
MAPK3
AKT1
GRB2
AKT2
PDPK1
PIK3R1
CASP9
CTNNB1
AXIN1
TP53
EGF
CCND1
EGFR
GSK3B
MAP2K1
PTEN
HRAS
hsa05212	Pancreatic cancer	19	2.3e-12	4.87e-10	5.41e-11
RALGDS
VEGFA
MAPK3
AKT1
VEGFC
AKT2
PIK3R1
CASP9
NFKB1
TP53
EGF
CCND1
EGFR
RB1
CDK6
CDC42
MAP2K1
CDK4
STAT3
hsa05219	Bladder cancer	15	6.45e-12	1.37e-09	1.37e-10
TP53
VEGFA
EGF
MAPK3
VEGFC
CCND1
MMP9
EGFR
MMP2
RB1
MAP2K1
MDM2
CDK4
CDKN1A
HRAS
hsa04510	Focal adhesion	31	1.83e-11	3.89e-09	3.53e-10
VEGFA
MET
AKT1
VEGFC
EGF
GSK3B
PAK1
MAPK3
GRB2
PDPK1
XIAP
SRC
CTNNB1
BIRC2
CCND3
CCND1
BCAR1
MAP2K1
MYLK
AKT2
PIK3R1
CCND2
KDR
CDC42
FLT1
HRAS
IGF1R
EGFR
HGF
PRKCA
PTEN
hsa04012	ErbB signaling pathway	20	2.45e-11	5.19e-09	4.33e-10
CAMK2B
MAPK3
AKT1
GRB2
AKT2
PIK3R1
SRC
PLCG2
CDKN1A
EGF
PLCG1
EGFR
CDKN1B
MAP2K1
GSK3B
PAK1
PRKCA
HRAS
MTOR
CBL
hsa05211	Renal cell carcinoma	18	5.4e-11	1.15e-08	8.81e-10
VEGFA
MAPK3
MET
AKT1
GRB2
VEGFC
HIF1A
AKT2
PIK3R1
EGLN1
CREBBP
EP300
CDC42
HGF
MAP2K1
PAK1
VHL
HRAS
hsa05222	Small cell lung cancer	20	7.41e-11	1.57e-08	1.12e-09
AKT1
AKT2
PIK3R1
CASP9
CCNE2
XIAP
NFKB1
TP53
BIRC2
CCNE1
CCND1
SKP2
RB1
CDK6
CDKN1B
CDK2
CDK4
PTEN
PTGS2
RXRB
hsa05220	Chronic myeloid leukemia	17	8.04e-10	1.7e-07	1.14e-08
MAPK3
AKT1
GRB2
AKT2
PIK3R1
CDKN1A
NFKB1
TP53
CCND1
RB1
CDK6
CDKN1B
MAP2K1
MDM2
CDK4
HRAS
CBL
hsa04660	T cell receptor signaling pathway	21	9.55e-10	2.02e-07	1.27e-08
LCK
CD247
AKT1
ZAP70
AKT2
PIK3R1
NFKB1
PTPRC
PLCG1
CDC42
GSK3B
CD4
CDK4
PAK1
HRAS
CBL
MAPK3
GRB2
PDK1
MAPK14
MAP2K1
hsa04370	VEGF signaling pathway	17	1.95e-09	4.14e-07	2.43e-08
VEGFA
PLA2G1B
MAPK3
AKT1
AKT2
PIK3R1
CASP9
MAPK14
SRC
PLCG2
PLCG1
KDR
CDC42
MAP2K1
PRKCA
PTGS2
HRAS
hsa05221	Acute myeloid leukemia	14	9.89e-09	2.1e-06	1.16e-07
MAPK3
AKT1
GRB2
PIM2
AKT2
PIK3R1
CCNA1
NFKB1
CCND1
MAP2K1
PIM1
STAT3
HRAS
MTOR
hsa04722	Neurotrophin signaling pathway	20	3.02e-08	6.41e-06	3.37e-07
CAMK2B
AKT1
AKT2
PIK3R1
BAX
NFKB1
TP53
PLCG1
CDC42
GSK3B
HRAS
MAPK3
GRB2
PDK1
CALM3
CALM1
MAPK14
PLCG2
IRS1
MAP2K1
hsa05210	Colorectal cancer	14	4.06e-08	8.6e-06	4.3e-07
RALGDS
MAPK3
AKT1
AKT2
PIK3R1
CASP9
BAX
CTNNB1
AXIN1
TP53
CCND1
GSK3B
CASP3
MAP2K1
hsa04914	Progesterone-mediated oocyte maturation	16	6.67e-08	1.42e-05	6.74e-07
MAPK3
AKT1
PRKACA
ANAPC11
AKT2
PIK3R1
IGF1R
CCNA1
MAPK14
HSP90AA1
MAP2K1
CDK2
CCNB3
CCNA2
CCNB2
CCNB1
hsa04114	Oocyte meiosis	18	8.2e-08	1.74e-05	7.9e-07
CAMK2B
AURKA
ANAPC11
CDC20
CCNE1
CDK2
AR
MAPK3
PRKACA
CALM3
IGF1R
CALM1
CUL1
CCNE2
MAP2K1
SKP1
CCNB2
CCNB1
hsa04664	Fc epsilon RI signaling pathway	15	4.95e-07	0.000105	4.57e-06
PLA2G1B
MAPK3
AKT1
GRB2
PDK1
SYK
AKT2
PIK3R1
MAPK14
PLCG2
BTK
PLCG1
MAP2K1
PRKCA
HRAS
hsa04520	Adherens junction	14	7.12e-07	0.000151	6.29e-06
MAPK3
MET
IQGAP1
IGF1R
SRC
INSR
PTPN1
CTNNB1
CREBBP
EP300
FGFR1
EGFR
CDC42
WAS
hsa04912	GnRH signaling pathway	16	7.97e-07	0.000169	6.75e-06
CAMK2B
PLA2G1B
MMP14
CDC42
HRAS
MAPK3
GRB2
PRKACA
CALM3
MMP2
CALM1
MAPK14
SRC
EGFR
MAP2K1
PRKCA
hsa04910	Insulin signaling pathway	19	9.57e-07	0.000203	7.81e-06
AKT1
AKT2
PIK3R1
INSR
HK1
GSK3B
PRKAA2
HRAS
CBL
MAPK3
GRB2
PRKACA
CALM3
PDPK1
CALM1
PTPN1
IRS1
MAP2K1
MTOR
hsa04916	Melanogenesis	15	4.11e-06	0.000871	3.23e-05
CAMK2B
GNAO1
CREBBP
GSK3B
HRAS
MAPK3
PRKACA
CALM3
CALM1
CTNNB1
EP300
TYR
CREB1
MAP2K1
PRKCA
hsa04210	Apoptosis	14	9.53e-06	0.00202	7.21e-05
AKT1
PRKACA
AKT2
PIK3R1
CASP9
BAX
XIAP
NFKB1
FAS
TP53
BIRC2
ATM
CASP3
CASP7
hsa04666	Fc gamma R-mediated phagocytosis	14	1.22e-05	0.00259	8.92e-05
AKT1
AKT2
PIK3R1
PTPRC
PLCG1
CDC42
WAS
PAK1
HCK
MAPK3
SYK
PLCG2
MAP2K1
PRKCA
hsa03430	Mismatch repair	7	1.36e-05	0.00289	9.63e-05
RFC2
RFC5
RFC3
POLD1
RFC4
PCNA
RFC1
hsa04150	mTOR signaling pathway	10	1.44e-05	0.00306	9.87e-05
VEGFA
MAPK3
AKT1
VEGFC
HIF1A
AKT2
PDPK1
PIK3R1
PRKAA2
MTOR
hsa04662	B cell receptor signaling pathway	12	1.79e-05	0.00379	0.000119
MAPK3
AKT1
GRB2
SYK
AKT2
PIK3R1
PLCG2
BTK
NFKB1
GSK3B
MAP2K1
HRAS
hsa05216	Thyroid cancer	8	2.08e-05	0.0044	0.000133
TP53
MAPK3
PPARG
CCND1
MAP2K1
CTNNB1
HRAS
RXRB
hsa03030	DNA replication	8	4.11e-05	0.0087	0.000256
RFC5
RFC3
RFC4
FEN1
PCNA
RFC1
RFC2
POLD1
hsa04720	Long-term potentiation	11	6.27e-05	0.0133	0.00038
CAMK2B
MAPK3
PRKACA
CALM3
CALM1
GRIA1
CREBBP
EP300
MAP2K1
PRKCA
HRAS
hsa04120	Ubiquitin mediated proteolysis	15	0.000162	0.0344	0.000954
ANAPC11
CDC20
BRCA1
SKP2
MDM2
KEAP1
UBE2I
CBL
CUL1
XIAP
BIRC2
SKP1
VHL
UBE2N
RCHY1
hsa04010	MAPK signaling pathway	24	0.000223	0.0474	0.00128
PLA2G1B
AKT1
NFKB1
TP53
EGF
FGF1
PAK1
MAPK3
GRB2
MAPK14
FAS
CASP3
MAP2K1
RASA1
AKT2
NFKB2
FGFR1
MAPT
CDC42
HRAS
PRKACA
FGF2
EGFR
PRKCA
hsa00980	Metabolism of xenobiotics by cytochrome P450	10	0.000271	0.0574	0.00151
CYP3A4
GSTA3
CYP1A1
GSTP1
GSTO1
CYP1B1
CYP1A2
CYP2C9
GSTA1
AKR1C3
hsa05120	Epithelial cell signaling in Helicobacter pylori infection	10	0.000342	0.0724	0.00186
MET
MAPK14
SRC
PLCG2
NFKB1
PLCG1
EGFR
CDC42
CASP3
PAK1
hsa04310	Wnt signaling pathway	15	0.000625	0.133	0.00331
CAMK2B
AXIN1
CREBBP
CCND2
TP53
GSK3B
PRKACA
CUL1
MMP7
CTNNB1
EP300
CCND3
CCND1
SKP1
PRKCA
hsa04062	Chemokine signaling pathway	17	0.000682	0.145	0.00353
AKT1
AKT2
PIK3R1
NFKB1
CDC42
GSK3B
WAS
PAK1
HRAS
HCK
MAPK3
GRB2
PRKACA
BCAR1
GSK3A
MAP2K1
STAT3
hsa00982	Drug metabolism - cytochrome P450	9	0.00132	0.281	0.00669
CYP3A4
MAOB
GSTA3
GSTP1
GSTO1
MAOA
CYP1A2
CYP2C9
GSTA1
hsa04650	Natural killer cell mediated cytotoxicity	15	0.00172	0.364	0.00847
LCK
CD247
ZAP70
PIK3R1
PLCG1
PAK1
HRAS
MAPK3
GRB2
SYK
PLCG2
FAS
CASP3
MAP2K1
PRKCA
hsa00590	Arachidonic acid metabolism	8	0.00179	0.379	0.00862
PLA2G1B
ALOX12
ALOX5
PTGS1
ALOX15
CYP2C9
PTGS2
AKR1C3
hsa04810	Regulation of actin cytoskeleton	17	0.00207	0.439	0.00962
EGF
FGF1
WAS
PAK1
PIP4K2A
MAPK3
BCAR1
MAP2K1
CHRM1
MYLK
PIK3R1
FGFR1
CDC42
HRAS
IQGAP1
FGF2
EGFR
hsa03420	Nucleotide excision repair	7	0.00209	0.443	0.00962
RFC5
RFC3
RFC2
POLD1
RFC4
PCNA
RFC1
hsa04540	Gap junction	10	0.00293	0.622	0.0132
EGF
HRAS
MAPK3
GRB2
PRKACA
SRC
EGFR
MAP2K1
PRKCA
TUBB1
hsa04960	Aldosterone-regulated sodium reabsorption	6	0.00337	0.715	0.0149
MAPK3
IRS1
PIK3R1
PDPK1
INSR
PRKCA
hsa00140	Steroid hormone biosynthesis	8	0.00359	0.761	0.0155
CYP3A4
SULT2B1
HSD17B1
HSD17B2
CYP19A1
CYP1A1
CYP1B1
AKR1C3
hsa05100	Bacterial invasion of epithelial cells	8	0.00393	0.834	0.0167
MET
PIK3R1
SRC
CTNNB1
BCAR1
CDC42
WAS
CBL
hsa00591	Linoleic acid metabolism	5	0.00463	0.981	0.0189
PLA2G1B
CYP3A4
ALOX15
CYP1A2
CYP2C9
hsa04320	Dorso-ventral axis formation	5	0.00463	0.981	0.0189
NOTCH4
MAPK3
GRB2
EGFR
MAP2K1
hsa04730	Long-term depression	8	0.00512	1	0.0205
PLA2G1B
MAPK3
IGF1R
GNAO1
GRIA1
MAP2K1
PRKCA
HRAS
hsa05010	Alzheimer's disease	14	0.00561	1	0.022
CDK5
CASP9
MAPT
HSD17B10
GSK3B
MME
MAPK3
CALM3
BACE1
CDK5R1
CALM1
FAS
CASP3
CASP7
hsa03410	Base excision repair	5	0.00801	1	0.0309
APEX1
FEN1
PCNA
POLD1
POLB
hsa04920	Adipocytokine signaling pathway	8	0.00828	1	0.0314
AKT1
AKT2
NFKB1
IRS1
PRKAA2
STAT3
RXRB
MTOR
hsa04070	Phosphatidylinositol signaling system	8	0.00893	1	0.0332
CALM3
PIK3R1
CALM1
PLCG2
PLCG1
PIP4K2A
PRKCA
PTEN
hsa05340	Primary immunodeficiency	6	0.0102	1	0.0375
LCK
ZAP70
TAP1
BTK
PTPRC
CD4
hsa04670	Leukocyte transendothelial migration	10	0.0118	1	0.0423
PIK3R1
MMP9
PLCG1
CDC42
MMP2
MAPK14
PLCG2
CTNNB1
BCAR1
PRKCA
hsa04930	Type II diabetes mellitus	6	0.0123	1	0.0436
MAPK3
PIK3R1
INSR
IRS1
HK1
MTOR
hsa00380	Tryptophan metabolism	5	0.0128	1	0.0439
CYP1A1
MAOB
CYP1B1
MAOA
CYP1A2
hsa04630	Jak-STAT signaling pathway	12	0.0128	1	0.0439
AKT1
AKT2
PIK3R1
CREBBP
CCND2
PIM1
CBL
GRB2
EP300
CCND3
CCND1
STAT3
hsa00480	Glutathione metabolism	6	0.0135	1	0.0454
PGD
GSTA3
LAP3
GSTP1
GSTO1
GSTA1
hsa00052	Galactose metabolism	4	0.0149	1	0.0493
HK1
AKR1B1
GAA
GALK1
hsa04971	Gastric acid secretion	7	0.0186	1	0.0607
CAMK2B
PRKACA
MYLK
CALM3
CALM1
CA2
PRKCA
hsa00232	Caffeine metabolism	2	0.0189	1	0.0607
CYP1A2
XDH
hsa05142	Chagas disease	9	0.0192	1	0.0607
CD247
AKT1
AKT2
PIK3R1
GNAO1
NFKB1
MAPK3
MAPK14
FAS
hsa00520	Amino sugar and nucleotide sugar metabolism	5	0.0231	1	0.0722
MPI
GPI
GFPT1
HK1
GALK1
hsa00360	Phenylalanine metabolism	3	0.0238	1	0.0731
PAH
MAOA
MAOB
hsa04530	Tight junction	10	0.0291	1	0.0882
AKT1
AKT2
CDC42
CDK4
HRAS
PARD6A
SRC
CTNNB1
PRKCA
PTEN
hsa00051	Fructose and mannose metabolism	4	0.0333	1	0.0991
MPI
HK1
AKR1B1
SORD
hsa05014	Amyotrophic lateral sclerosis (ALS)	6	0.0336	1	0.0991
CASP9
MAPK14
BAX
GRIA1
TP53
CASP3
hsa04144	Endocytosis	14	0.0428	1	0.123
MET
EGF
PARD6A
SRC
KDR
CDC42
MDM2
FLT1
HRAS
CBL
IGF1R
EPS15
EGFR
SH3KBP1
hsa04621	NOD-like receptor signaling pathway	6	0.0432	1	0.123
MAPK3
MAPK14
XIAP
NFKB1
HSP90AA1
BIRC2
hsa00983	Drug metabolism - other enzymes	5	0.0437	1	0.123
CYP3A4
UCK2
HPRT1
CES2
XDH
hsa00790	Folate biosynthesis	2	0.0514	1	0.143
ALPL
ALPPL2
hsa02010	ABC transporters	5	0.057	1	0.157
TAP1
ABCG2
ABCC2
ABCC4
ABCC1
hsa04020	Calcium signaling pathway	11	0.0667	1	0.181
CAMK2B
CD38
CHRM1
MYLK
PLCG1
PRKACA
CALM3
CALM1
PLCG2
EGFR
PRKCA
hsa05131	Shigellosis	5	0.0725	1	0.195
MAPK3
MAPK14
NFKB1
CDC42
WAS
hsa04270	Vascular smooth muscle contraction	8	0.0736	1	0.195
PLA2G1B
MYLK
MAPK3
PRKACA
CALM3
CALM1
MAP2K1
PRKCA
hsa05020	Prion diseases	4	0.0807	1	0.211
MAPK3
PRKACA
BAX
MAP2K1
hsa00920	Sulfur metabolism	2	0.0828	1	0.214
SULT2B1
SULT1A1
hsa05130	Pathogenic Escherichia coli infection	5	0.09	1	0.23
CTNNB1
CDC42
WAS
PRKCA
TUBB1
hsa00260	Glycine, serine and threonine metabolism	3	0.1	1	0.252
DLD
MAOB
MAOA
hsa04620	Toll-like receptor signaling pathway	7	0.109	1	0.271
AKT1
AKT2
PIK3R1
NFKB1
MAPK3
MAPK14
MAP2K1
hsa04970	Salivary secretion	6	0.11	1	0.272
CD38
PRKACA
CALM3
AMY1C
CALM1
PRKCA
hsa04360	Axon guidance	8	0.113	1	0.275
CDK5
MET
RASA1
CDC42
GSK3B
PAK1
HRAS
MAPK3
hsa00500	Starch and sucrose metabolism	4	0.122	1	0.294
GPI
AMY1C
HK1
GAA
hsa04350	TGF-beta signaling pathway	6	0.124	1	0.296
MAPK3
SP1
CUL1
CREBBP
EP300
SKP1
hsa04330	Notch signaling pathway	4	0.135	1	0.318
NOTCH4
KAT2B
CREBBP
EP300
hsa05217	Basal cell carcinoma	4	0.149	1	0.347
CTNNB1
AXIN1
TP53
GSK3B
hsa05110	Vibrio cholerae infection	4	0.171	1	0.389
PRKACA
PLCG2
PLCG1
PRKCA
hsa00562	Inositol phosphate metabolism	4	0.171	1	0.389
PLCG2
PLCG1
PIP4K2A
PTEN
hsa00620	Pyruvate metabolism	3	0.178	1	0.401
DLD
GLO1
AKR1B1
hsa00350	Tyrosine metabolism	3	0.197	1	0.437
TYR
MAOB
MAOA
hsa04710	Circadian rhythm - mammal	2	0.198	1	0.437
CUL1
SKP1
hsa00830	Retinol metabolism	4	0.201	1	0.439
CYP3A4
CYP1A1
CYP1A2
CYP2C9
hsa00010	Glycolysis / Gluconeogenesis	4	0.209	1	0.451
GPI
AKR1A1
DLD
HK1
hsa05016	Huntington's disease	9	0.245	1	0.525
CASP9
BAX
CREBBP
TP53
SP1
PPARG
EP300
CREB1
CASP3
hsa00030	Pentose phosphate pathway	2	0.254	1	0.538
GPI
PGD
hsa04744	Phototransduction	2	0.282	1	0.586
CALM3
CALM1
hsa00340	Histidine metabolism	2	0.282	1	0.586
MAOB
MAOA
hsa00330	Arginine and proline metabolism	3	0.318	1	0.655
MAOB
LAP3
MAOA
hsa00565	Ether lipid metabolism	2	0.379	1	0.772
PLA2G1B
PAFAH1B3
hsa05146	Amoebiasis	5	0.386	1	0.78
PIK3R1
NFKB1
PRKACA
CASP3
PRKCA
hsa00280	Valine, leucine and isoleucine degradation	2	0.482	1	0.964
DLD
HSD17B10
hsa04962	Vasopressin-regulated water reabsorption	2	0.494	1	0.979
PRKACA
CREB1
hsa03320	PPAR signaling pathway	3	0.527	1	1
PDPK1
PPARG
RXRB
hsa00561	Glycerolipid metabolism	2	0.606	1	1
AKR1A1
AKR1B1
hsa00230	Purine metabolism	6	0.611	1	1
POLD1
GART
PDE4D
XDH
DCK
HPRT1
hsa05144	Malaria	2	0.626	1	1
MET
HGF
hsa04340	Hedgehog signaling pathway	2	0.626	1	1
PRKACA
GSK3B
hsa04080	Neuroactive ligand-receptor interaction	9	0.717	1	1
ADORA3
OPRK1
CHRM1
OPRM1
OPRD1
GRIA1
PLG
PRSS1
NR3C1
hsa04060	Cytokine-cytokine receptor interaction	9	0.736	1	1
VEGFA
MET
VEGFC
EGF
FAS
KDR
FLT1
EGFR
HGF
hsa04640	Hematopoietic cell lineage	3	0.77	1	1
CD38
CD4
MME
hsa00240	Pyrimidine metabolism	3	0.77	1	1
POLD1
UCK2
DCK
hsa05140	Leishmaniasis	4	0.775	1	1
NFKB1
PTGS2
MAPK3
MAPK14
hsa04622	RIG-I-like receptor signaling pathway	2	0.79	1	1
MAPK14
NFKB1
hsa04146	Peroxisome	2	0.79	1	1
PECR
XDH
hsa05416	Viral myocarditis	3	0.906	1	1
CASP9
CCND1
CASP3
hsa04612	Antigen processing and presentation	4	0.915	1	1
HSP90AA1
CD4
TAP1
CREB1
hsa05012	Parkinson's disease	2	0.959	1	1
CASP9
CASP3
hsa04142	Lysosome	2	0.965	1	1
NANH
GAA
hsa04145	Phagosome	3	0.996	1	1
MPO
TUBB1
TAP1
hsa04514	Cell adhesion molecules (CAMs)	2	0.997	1	1
PTPRC
CD4
hsa04740	Olfactory transduction	4	1	1	1
CAMK2B
PRKACA
CALM3
CALM1
hsa04742	Taste transduction	1	1	1	1
PRKACA
hsa00400	Phenylalanine, tyrosine and tryptophan biosynthesis	1	1	1	1
PAH
hsa05414	Dilated cardiomyopathy	1	1	1	1
PRKACA
hsa00670	One carbon pool by folate	1	1	1	1
GART
hsa00910	Nitrogen metabolism	1	1	1	1
CA2
hsa05410	Hypertrophic cardiomyopathy (HCM)	1	1	1	1
PRKAA2
hsa05412	Arrhythmogenic right ventricular cardiomyopathy (ARVC)	1	1	1	1
CTNNB1
hsa00524	Butirosin and neomycin biosynthesis	1	1	1	1
HK1
hsa04940	Type I diabetes mellitus	1	1	1	1
FAS
hsa00310	Lysine degradation	1	1	1	1
EHMT2
hsa04623	Cytosolic DNA-sensing pathway	1	1	1	1
NFKB1
hsa00592	alpha-Linolenic acid metabolism	1	1	1	1
PLA2G1B
hsa00020	Citrate cycle (TCA cycle)	1	1	1	1
DLD
hsa04610	Complement and coagulation cascades	1	1	1	1
PLG
hsa00511	Other glycan degradation	1	1	1	1
NANH
hsa04614	Renin-angiotensin system	1	1	1	1
MME
hsa00740	Riboflavin metabolism	1	1	1	1
TYR
hsa00601	Glycosphingolipid biosynthesis - lacto and neolacto series	1	1	1	1
ABO
hsa00600	Sphingolipid metabolism	1	1	1	1
NANH
hsa03450	Non-homologous end-joining	1	1	1	1
FEN1
hsa00040	Pentose and glucuronate interconversions	1	1	1	1
AKR1B1
hsa03440	Homologous recombination	1	1	1	1
POLD1
hsa00100	Steroid biosynthesis	1	1	1	1
SQLE
hsa00760	Nicotinate and nicotinamide metabolism	1	1	1	1
CD38
hsa05322	Systemic lupus erythematosus	1	1	1	1
ELANE
hsa05320	Autoimmune thyroid disease	1	1	1	1
FAS
hsa03010	Ribosome	1	1	1	1
RPL11
hsa00250	Alanine, aspartate and glutamate metabolism	1	1	1	1
GFPT1
hsa00970	Aminoacyl-tRNA biosynthesis	1	1	1	1
KARS
hsa04140	Regulation of autophagy	1	1	1	1
PRKAA2
hsa00564	Glycerophospholipid metabolism	1	1	1	1
PLA2G1B
hsa04966	Collecting duct acid secretion	1	1	1	1
CA2
hsa05330	Allograft rejection	1	1	1	1
FAS
hsa04964	Proximal tubule bicarbonate reclamation	1	1	1	1
CA2
hsa05332	Graft-versus-host disease	1	1	1	1
FAS
hsa01040	Biosynthesis of unsaturated fatty acids	1	1	1	1
PECR
